# Supplementary material for: Visible LED-based photo-redox properties of sulfur and nitrogen-doped carbon dots designed by solid-state synthesis
Source: Royal Society of Chemistry journal article supplement (doi:10.1039/d1ma00860a), 2021-10-19
Supplement: d1ma00860a1.pdf [file d1ma00860a1.pdf]

Supporting information

## Visible LED-based photo-redox properties of sulfur and nitrogen-doped carbon dots designed by solid-state synthesis

Neha Kaushal,<sup>ab</sup> Amit Lochan Sharma<sup>ab</sup> and Avishek Saha\*<sup>ab</sup>

<sup>a</sup>Central Scientific Instruments Organisation (CSIR-CSIO), Sector-30C, Chandigarh-160030, India

<sup>b</sup>Academy of Scientific and Innovative Research (AcSIR-CSIO), Ghaziabad-201002, India

### Table of Contents (10 pages, 13 figures, 3 tables)

**FigureS1.** Excitation dependent photoluminescence spectra for (a) N-CD-1, (b) N-CD-2, (c) S,N-CD-1 and (d) S,N-CD-2 with emission maxima at 460 nm, 420 nm, 340 nm and 340 nm excitation wavelength respectively.

**FigureS2.** 3D PL plots for (a) N-CD-1 and (b) S,N-CD-1 with emission range from 300 to 680 nm.

**FigureS3.** HR-TEM images (scale bar = 200 nm) of (a) N-CD-1 and (b) N-CD-2 along with their size distributions, analyzed by ImageJ software.

**FigureS4.** (a) HR-TEM images (scale bar = 200 nm) of N-CD-2 and size-distributions for (b) N-CD-2 and (c) S, N-CD-2, analyzed by ImageJ software.

**Table S1.** The average nanoparticle size and polydispersity value were measured by Gaussian fitting of size distribution.

**Figure S5.** Raman Spectra of N-CD-1, N-CD-2, S,N-CD-1, and S, N-CD-2 measured with 514 nm excitation.

**Figure S6.** The deconvoluted plots for (a) C(1s), (b) N(1s), (c) O (1s) and (d) S(2p) elements in XPS spectra of S,N-CD-2.

**Figure S7:** Lifetime measurement plots for (a) N-CD-1, (b) N-CD-2, (c) S,N-CD-1 and (d) S,N-CD-2 fitted with biexponential curve fitting method.

**TABLE S2:** Photoluminescence bi-exponential decay constants of all the CDs.

**Figure S8:** Time -resolved UV-Vis absorbance spectra of (a) N-CD-1, (b) N-CD-2, (c) S,N-CD-1 and (d) S,N-CD-2 in the presence of methyl viologen (1 mM) and EDTA (0.1M, pH 6) at different time intervals upon LED (410 nm) illumination under inert atmosphere. The spectra are background corrected for all samples.

**Figure S9:** Time -resolved UV-Vis absorbance spectra of (a) N-CD-1, (b) N-CD-2, (c) S,N-CD-1 and (d) S,N-CD-2 in the presence of methyl viologen (1 mM) and EDTA (0.1M, pH 6) at different time intervals upon LED (455 nm) illumination under inert atmosphere. The spectra are background corrected for all samples.

**Figure S10:** Bar graph representing Zeta potential values of N-CD-1, N-CD-2, S, N-CD-1 and S, N-CD-2 in mV (Taken in three consecutive measurements with D.I. water as solvent).

**TABLE S3:** Average Zeta Potential Value of all CDs with Standard Deviation values.

**Figure S11:** Sequential MV<sup>2+</sup> photoreduction runs using N-CD-2 using 410 nm LED.

**Figure S12:** Sequential MV<sup>2+</sup> photoreduction runs using N-CD-2 using 455 nm LED.

**Figure S13:** Spectra of 410 nm LED employed as light source of illumination, taken via absorption spectrometer, Model No. Avantes Starline, Avaspec-3648.

**Figure S14:** Spectra of 455 nm LED employed as light source of illumination, taken absorption spectrometer, Model No. Avantes Starline, Avaspec-3648.

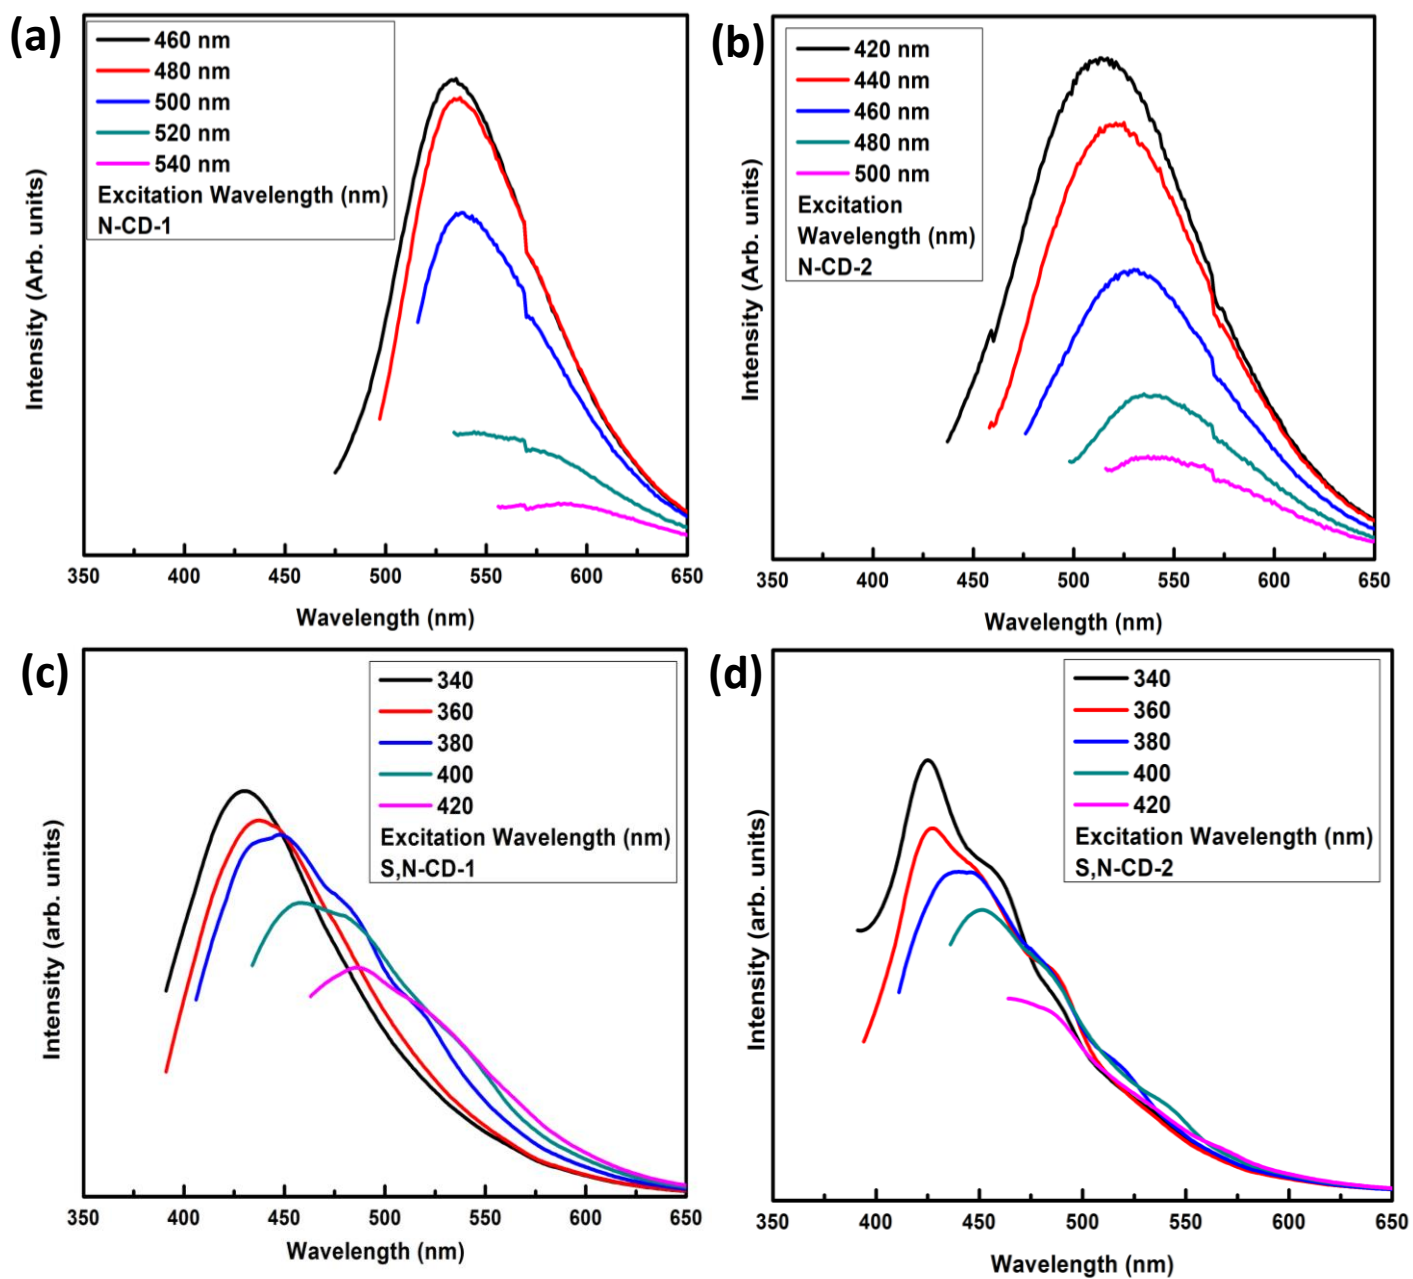

**Figure S1:** Excitation dependent photoluminescence spectra for (a) N-CD-1, (b) N-CD-2, (c) S,N-CD-1 and (d) S,N-CD-2 with emission maxima at 460 nm, 420 nm, 340 nm and 340 nm excitation wavelength respectively.

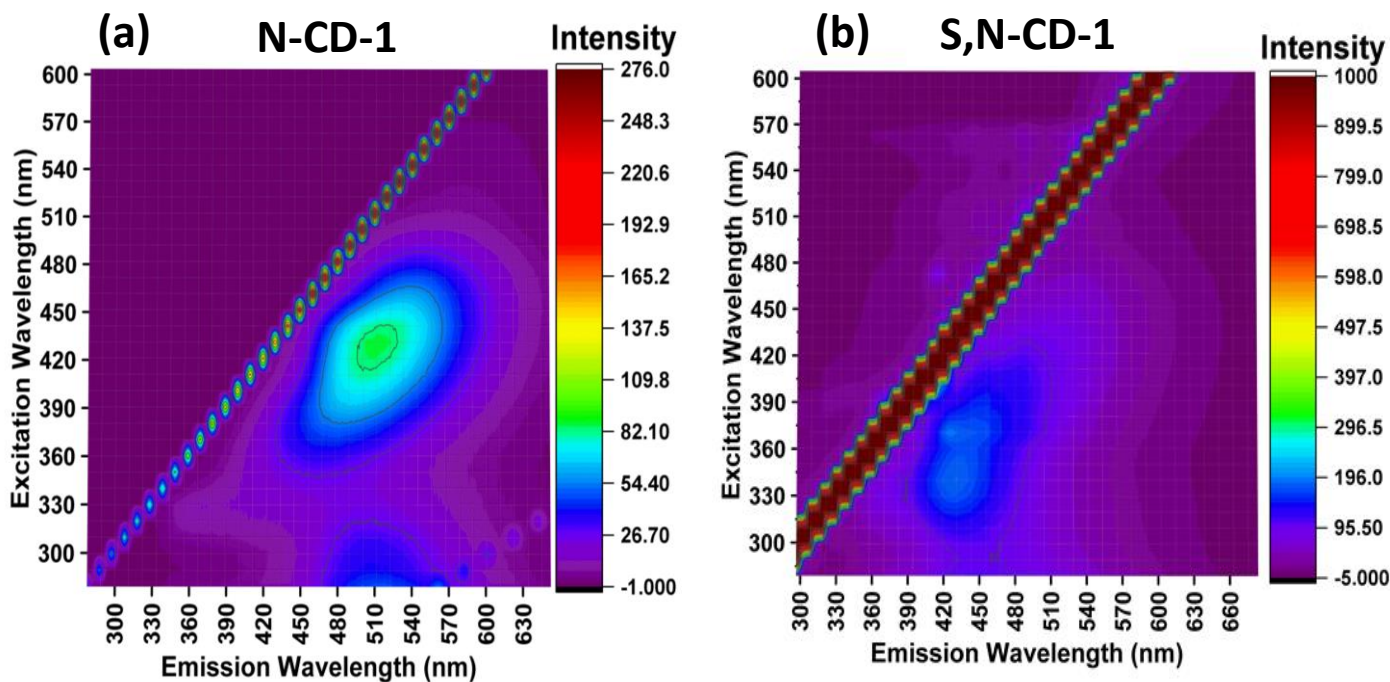

Figure S2: 3D PL plots for (a) N-CD-1 and (b) S,N-CD-1 with emission range from 300 to 680 nm.

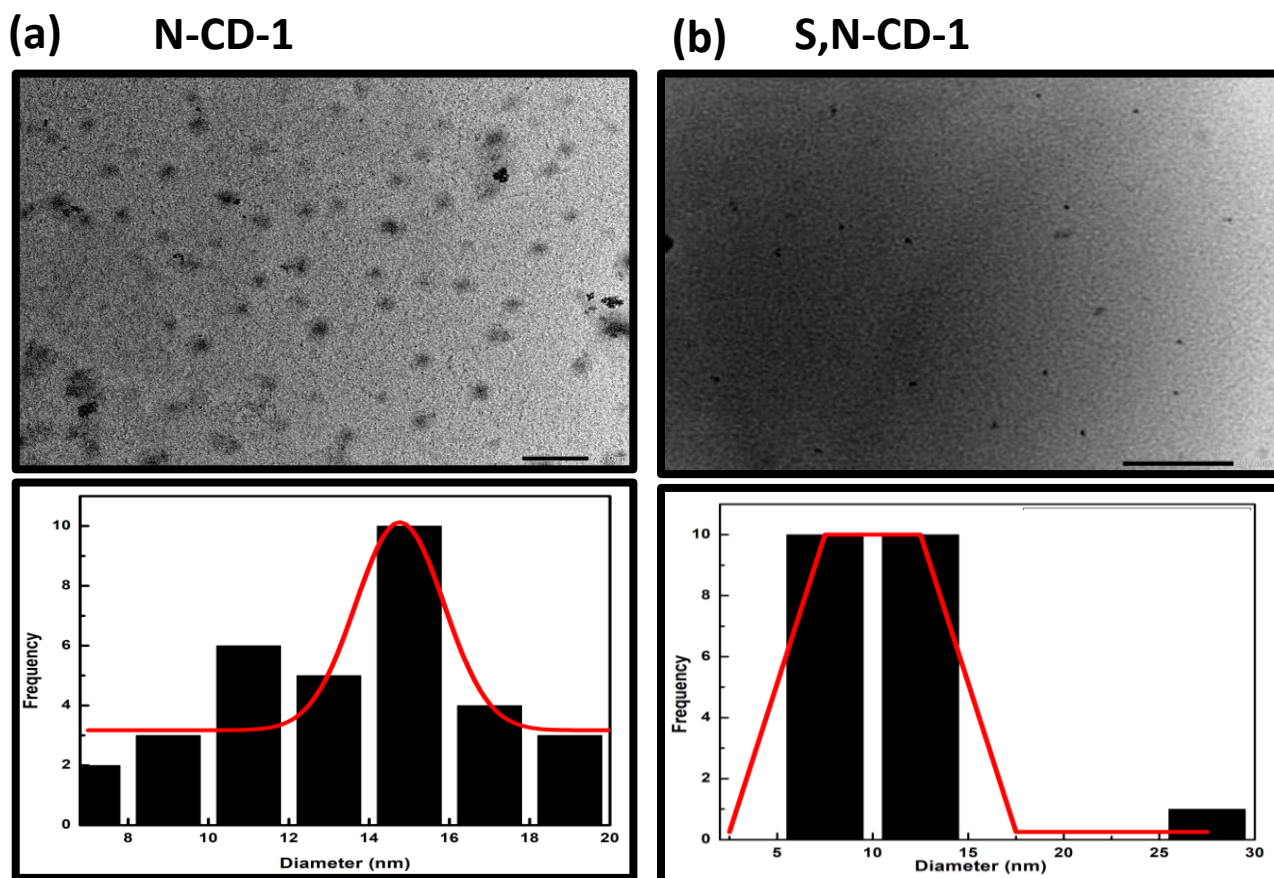

Figure S3: HR-TEM images (scale bar = 200 nm) of (a) N-CD-1 and (b) S,N-CD-1 along with their size distributions, analyzed by ImageJ software.

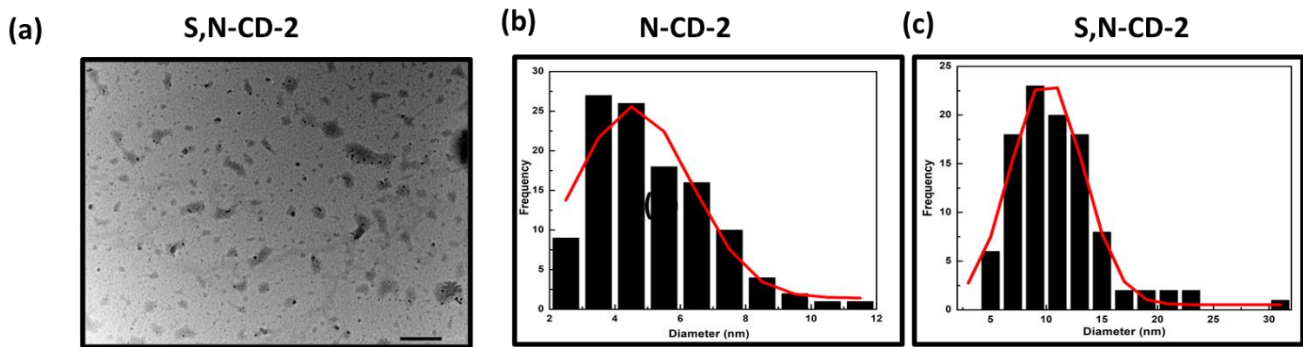

**Figure S4:** (a) HR-TEM images (scale bar = 200 nm) of N-CD-2 and size-distributions for (b) N-CD-2 and (c) S , N-CD-2, analyzed by ImageJ software.

| Sample   | Average Nanoparticle size ( $\bar{x}$ ) in (nm) | Standard deviation ( $\sigma$ ) | % age Polydispersity ( $\sigma/\bar{x}$ )*100 |
|----------|-------------------------------------------------|---------------------------------|-----------------------------------------------|
| N-CD-1   | 14.76                                           | 1.100                           | 7.45%                                         |
| N-CD-2   | 04.55                                           | 1.776                           | 38.97%                                        |
| S,N-CD-1 | 10.00                                           | 1.320                           | 13.2%                                         |
| S,N-CD-2 | 10.05                                           | 3.253                           | 32.35%                                        |

**TABLE S1:** The average nanoparticle size and polydispersity value were measured by Gaussian fitting of size distribution.

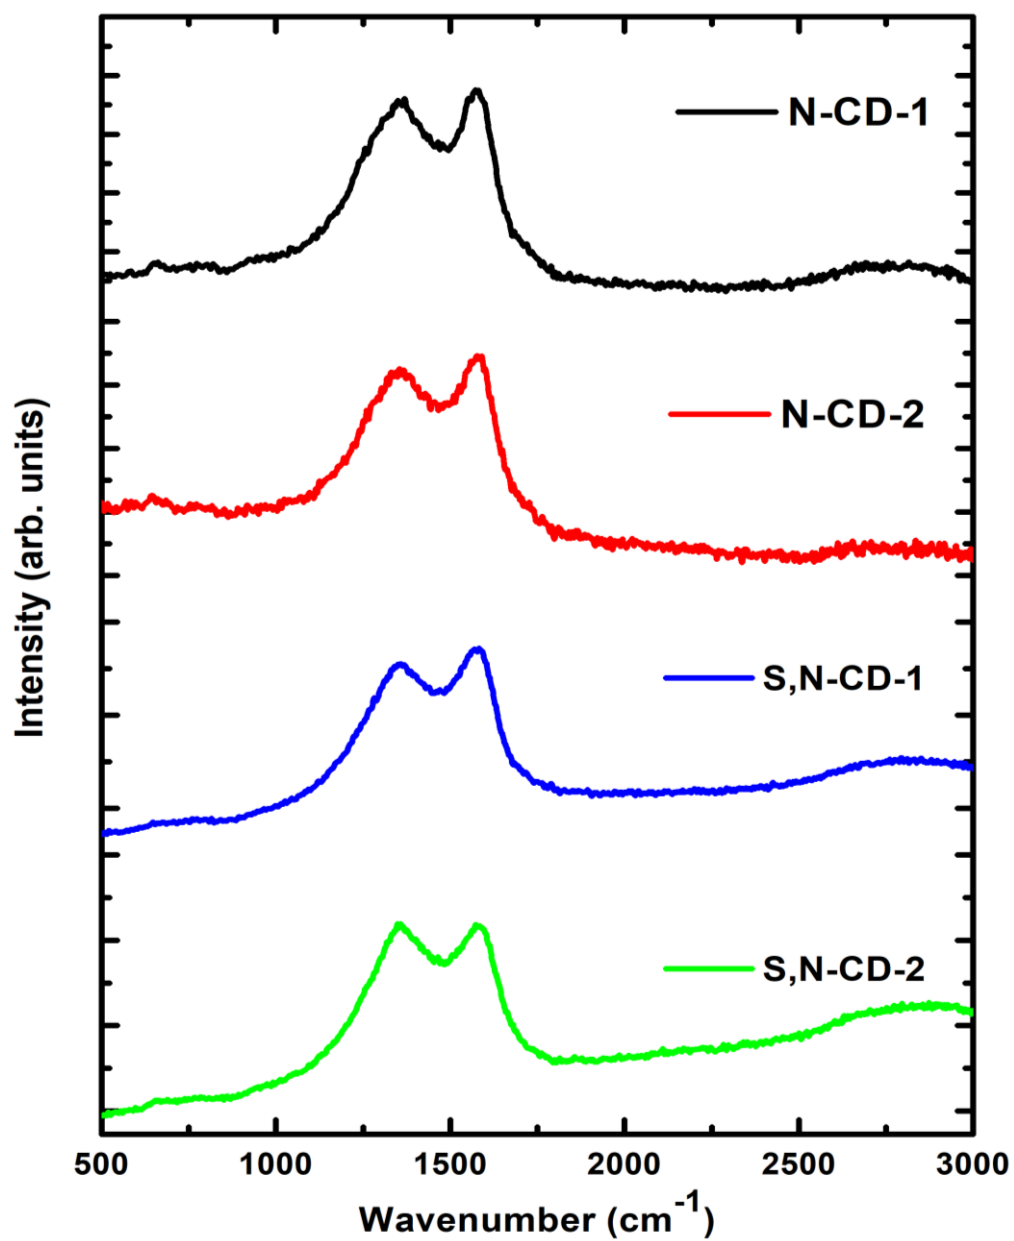

**Figure S5:** Raman Spectra of N-CD-1, N-CD-2, S, N-CD-1, and S, N-CD-2 measured with 514 nm excitation.

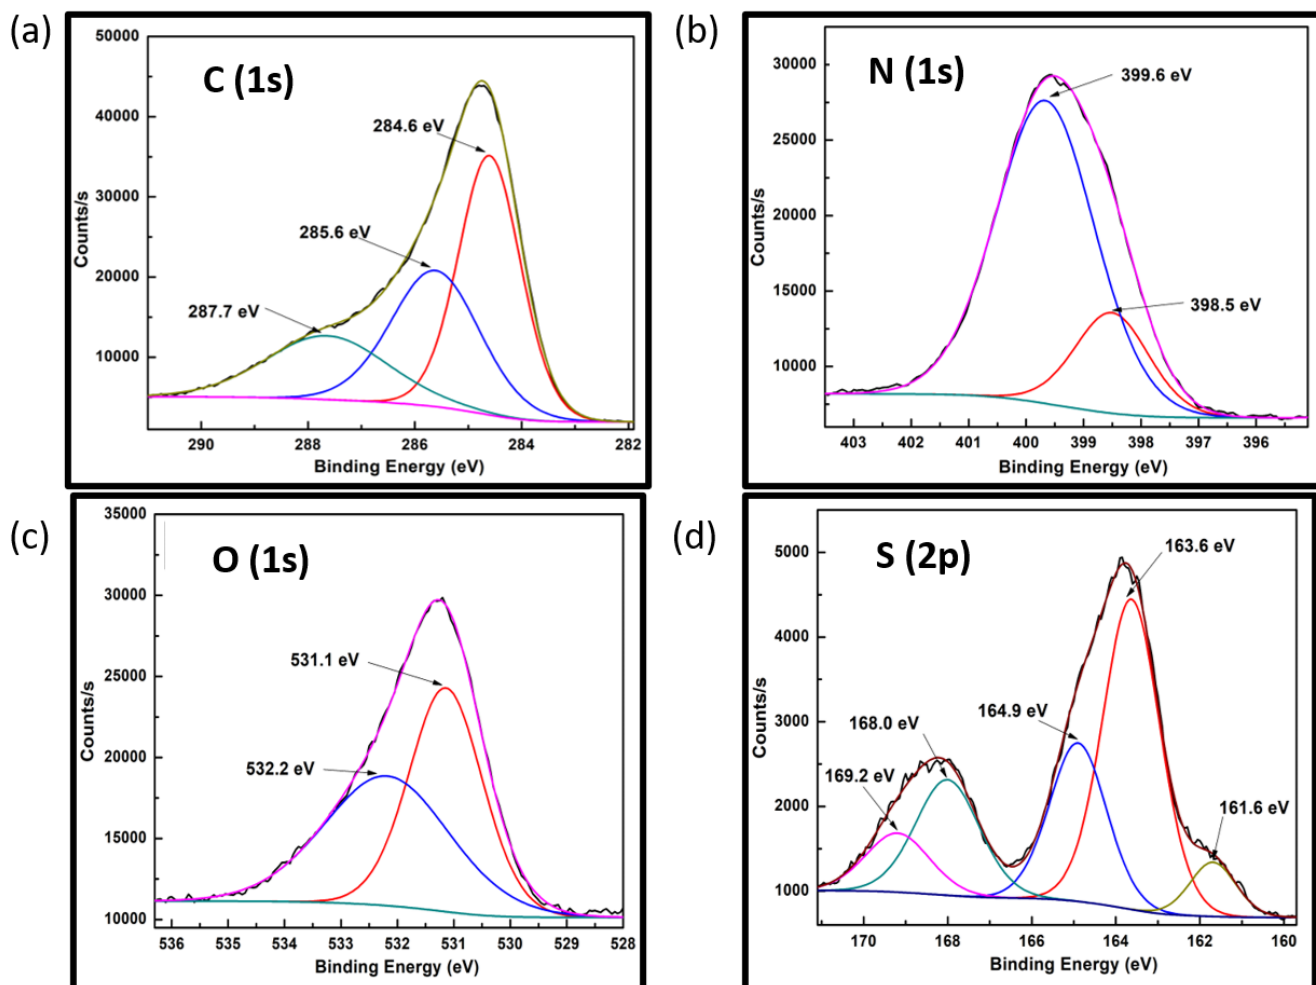

**Figure S6:** The deconvoluted plots for (a) C(1s), (b) N(1s), (c) O (1s) and (d) S(2p) elements in XPS spectra of S,N-CD-2.

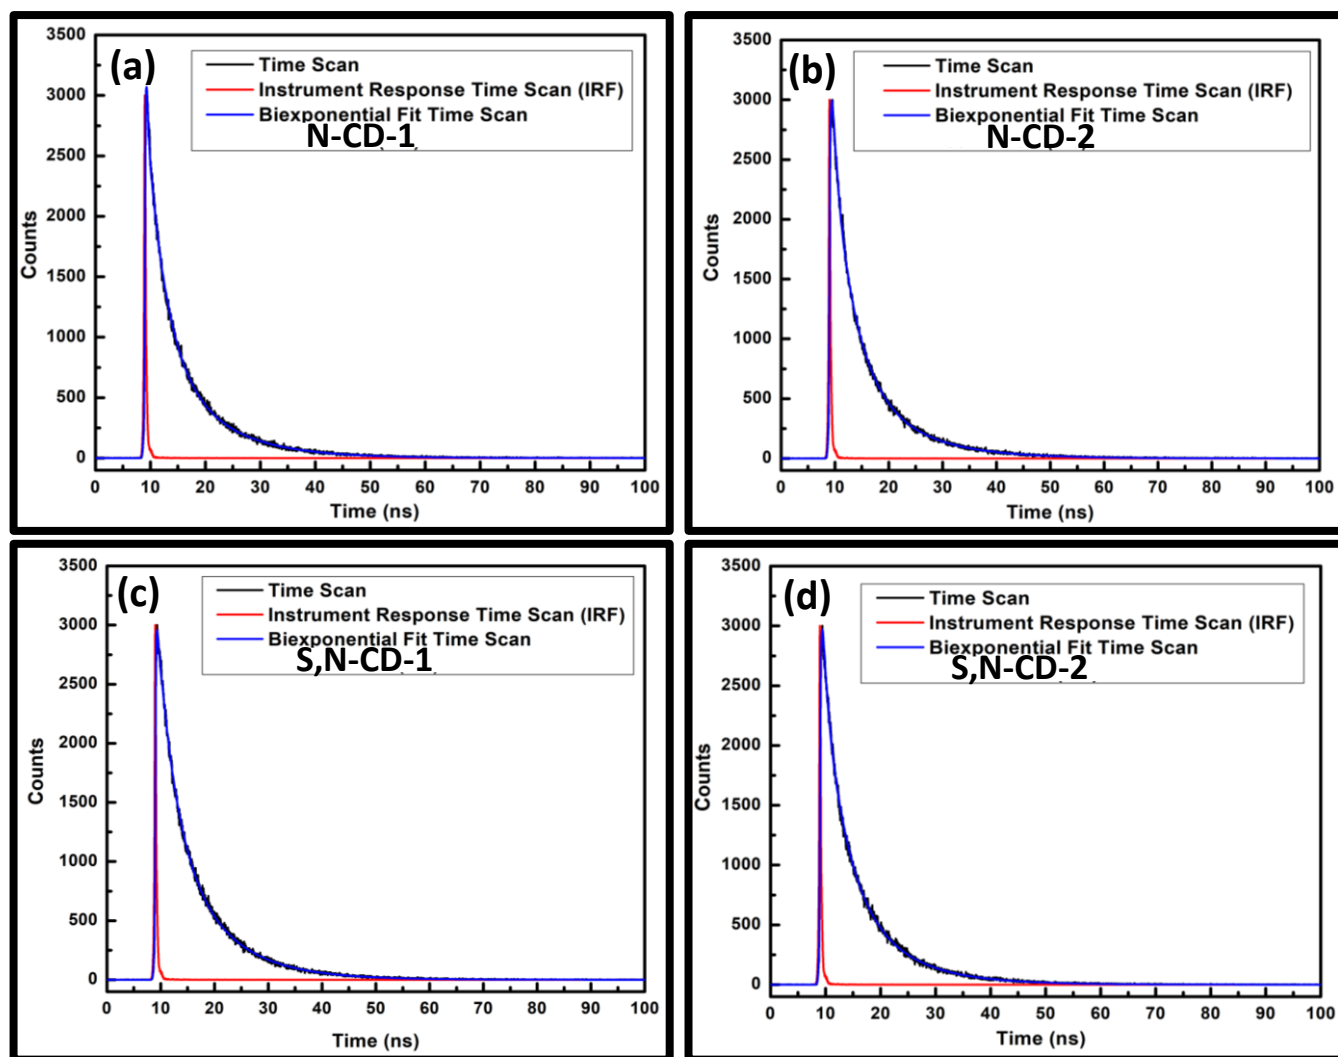

**Figure S7:** Lifetime measurement plots for (a) N-CD-1, (b) N-CD-2, (c) S,N-CD-1 and (d) S,N-CD-2 fitted with biexponential curve fitting method.

| Sample   | $\tau_1$ ns, (rel %) | $\tau_2$ ns, (rel%) | $\tau_{avg}$ (ns) |
|----------|----------------------|---------------------|-------------------|
| N-CD-1   | 2.54 (31.6%)         | 9.63 (68.4%)        | 7.34              |
| N-CD-2   | 2.94 (37.2%)         | 10.06 (62.8%)       | 7.41              |
| S,N-CD-1 | 2.39 (27.3%)         | 8.97 (72.7%)        | 7.17              |
| S,N-CD-2 | 2.58 (27.9%)         | 8.93 (72.1%)        | 7.15              |

**TABLE S2:** Photoluminescence bi-exponential decay constants of all the CDs.

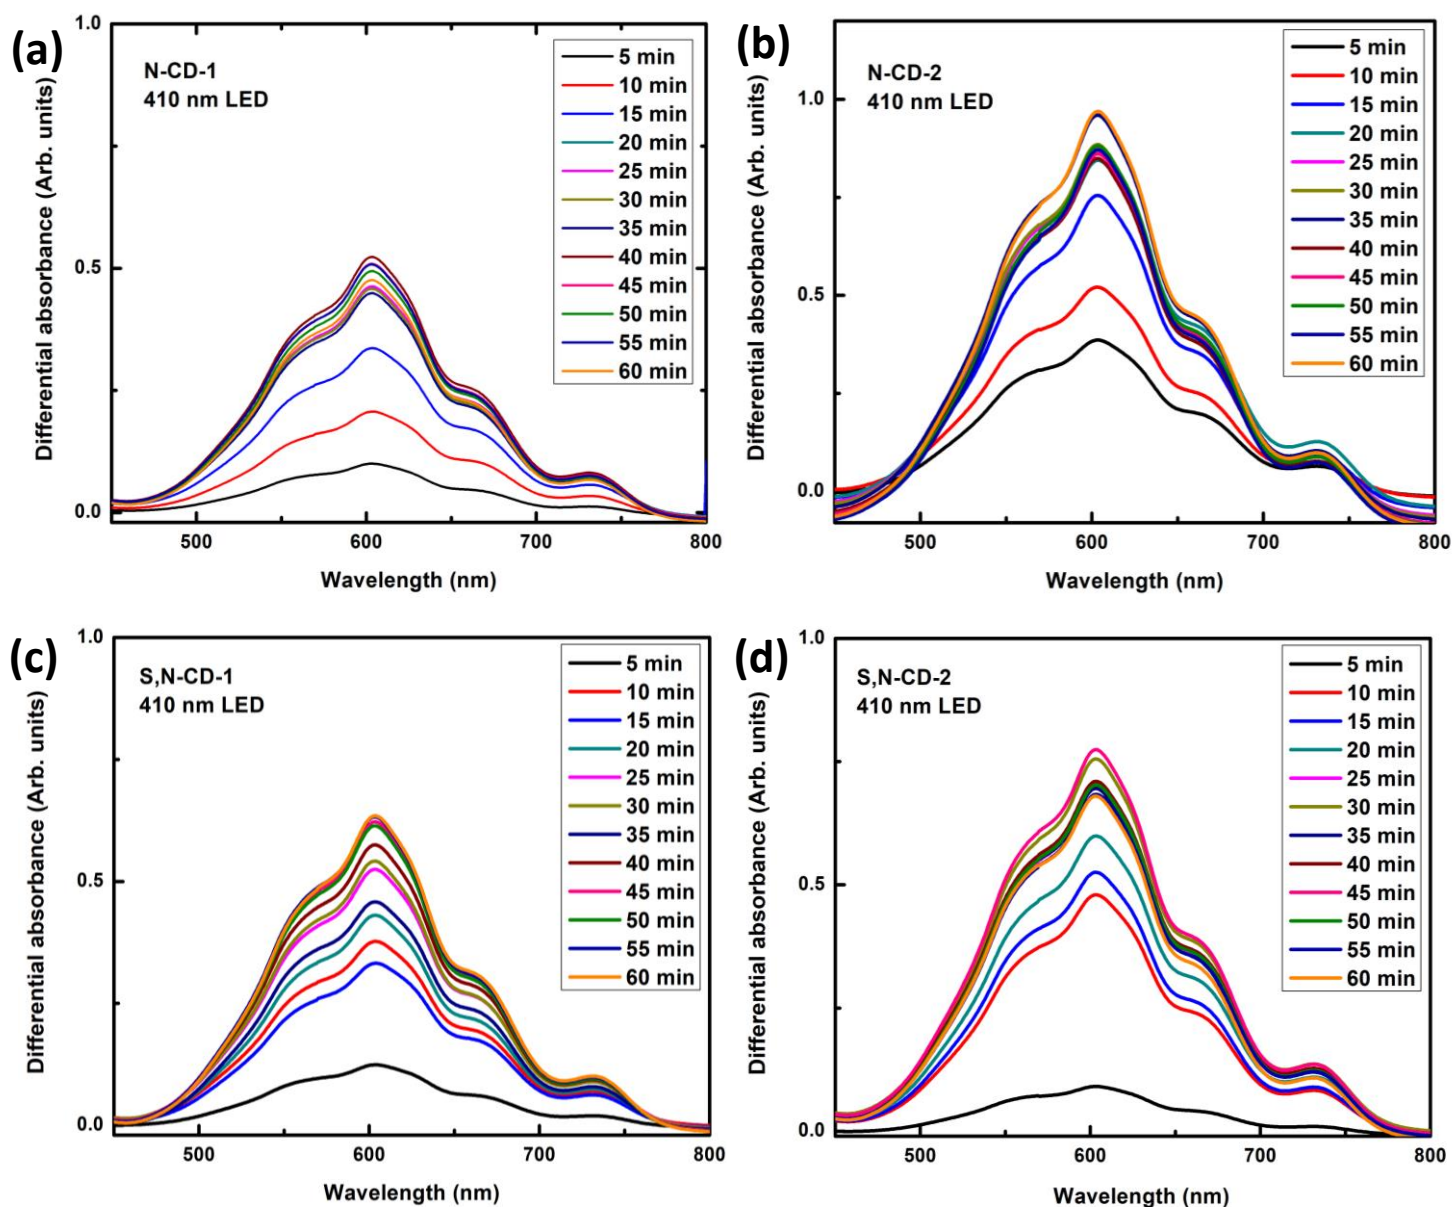

**Figure S8:** Time -resolved UV-Vis absorbance spectra of (a) N-CD-1, (b) N-CD-2, (c) S,N-CD-1 and (d) S,N-CD-2 in the presence of methyl viologen (1 mM) and EDTA (0.1M, pH 6) at different time intervals upon LED (410 nm) illumination under inert atmosphere. The spectra are background corrected for all samples.



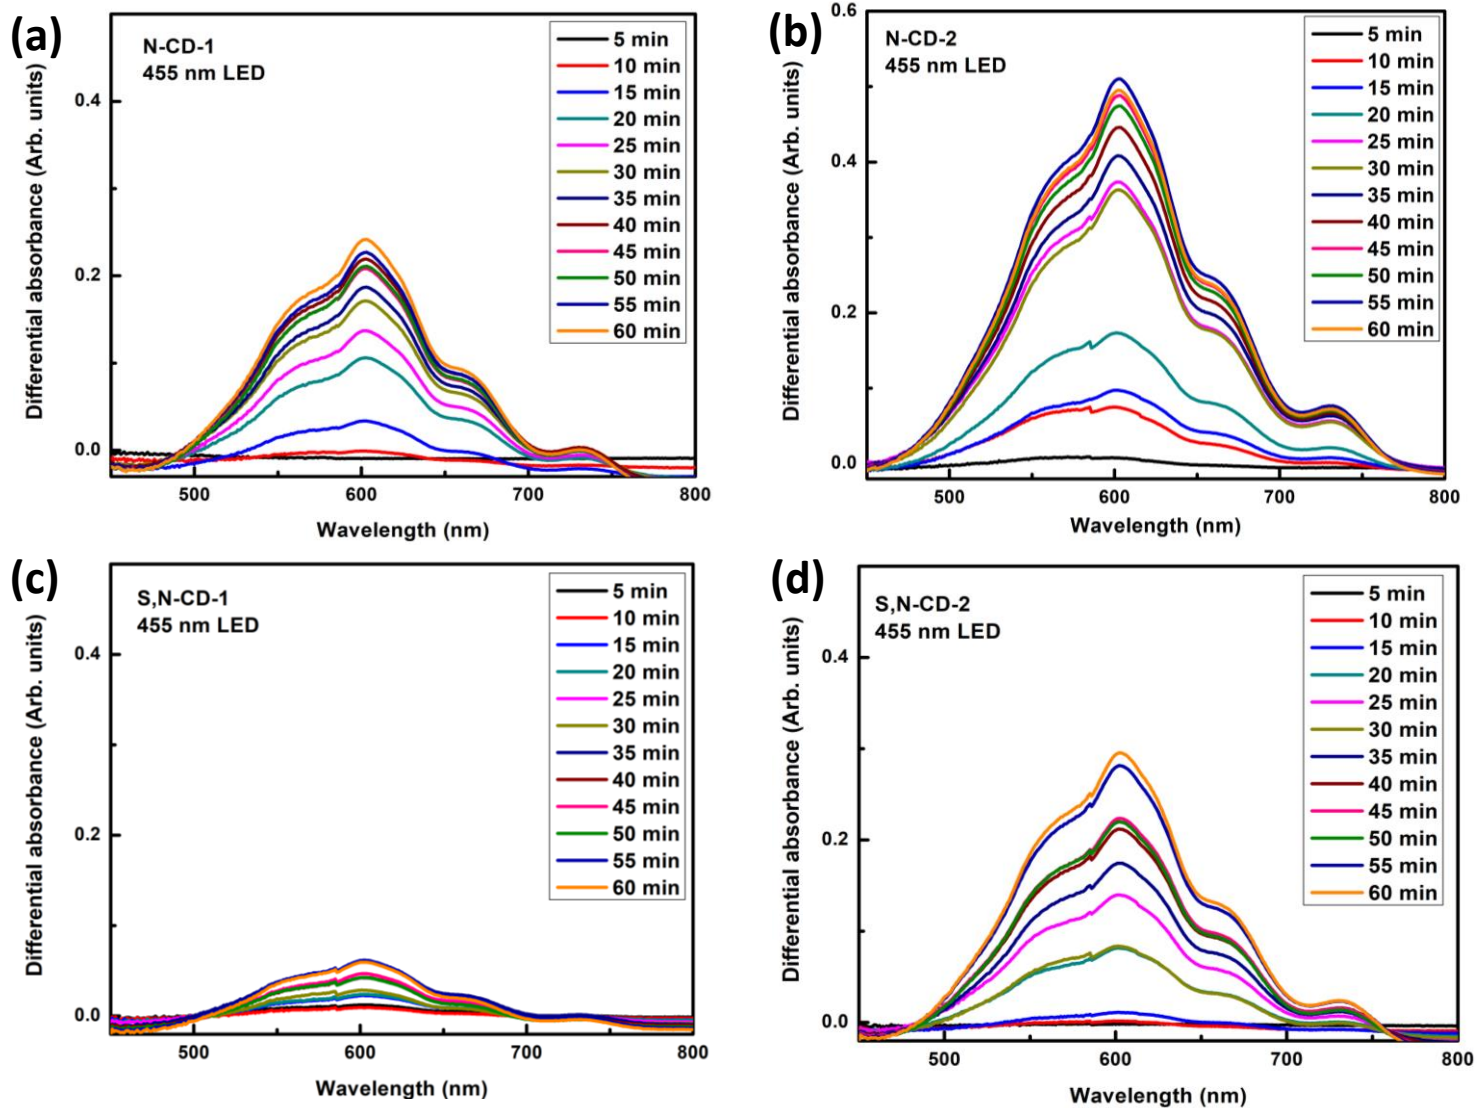

**Figure S9:** Time -resolved UV-Vis absorbance spectra of (a) N-CD-1, (b) N-CD-2, (c) S,N-CD-1 and (d) S,N-CD-2 in the presence of methyl viologen (1 mM) and EDTA (0.1M, pH 6) at different time intervals upon LED (455 nm) illumination under inert atmosphere. The spectra are background corrected for all samples.

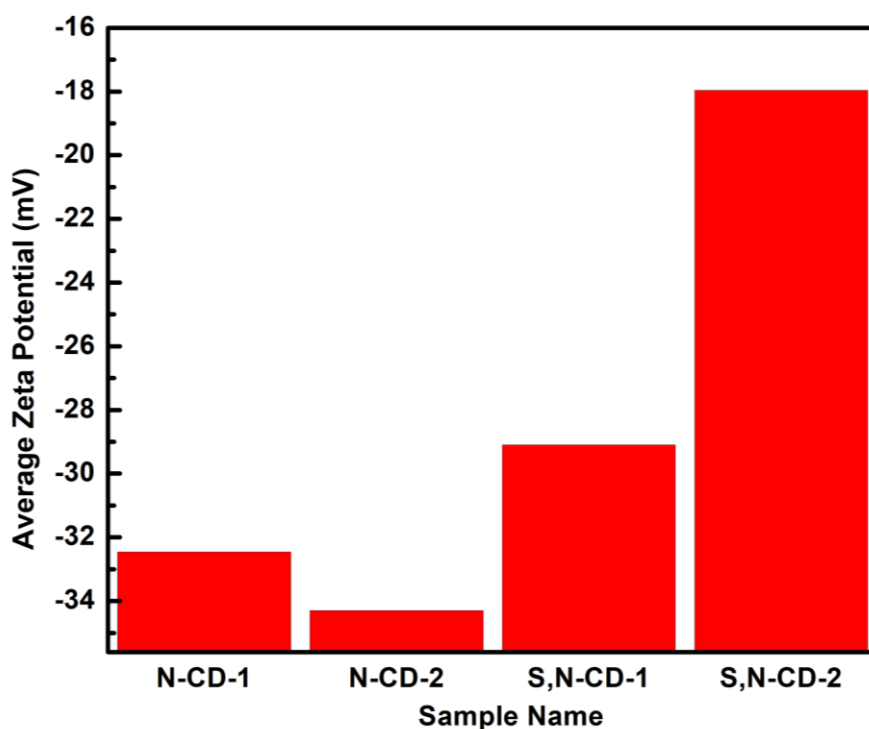

**Figure S10:** Bar graph representing Zeta potential values of N-CD-1, N-CD-2, S, N-CD-1 and S, N-CD-2 in mV (Taken in three consecutive measurements with D.I. water as solvent).

| Sample Name                         | Zeta Potential value(mV) for three measurements (M1, M2, M3) | Average Zeta Potential Value (mV) | Standard Deviation |
|-------------------------------------|--------------------------------------------------------------|-----------------------------------|--------------------|
| N-CD-(1:1)-250<br>(N-CD-1)          | M1 = -32.6                                                   | -32.46                            | 0.4989             |
|                                     | M2 = -33.0                                                   |                                   |                    |
|                                     | M3 = -31.8                                                   |                                   |                    |
| N-CD-(1:3)-250<br>(N-CD-2)          | M1 = -34.0                                                   | -34.3                             | 1.363              |
|                                     | M2 = -36.1                                                   |                                   |                    |
|                                     | M3 = -32.8                                                   |                                   |                    |
| S, N-CD-(1:1)-<br>250<br>(S,N-CD-1) | M1 = -28.3                                                   | -29.1                             | 0.5715             |
|                                     | M2 = -29.4                                                   |                                   |                    |
|                                     | M3 = -29.6                                                   |                                   |                    |
| S, N-CD-(1:3)-<br>250<br>(S,N-CD-2) | M1 = -18.1                                                   | -17.96                            | 0.66               |
|                                     | M2 = -17.1                                                   |                                   |                    |
|                                     | M3 = -18.7                                                   |                                   |                    |

**TABLE S3:** Average Zeta Potential Value of all CDs with Standard Deviation values.

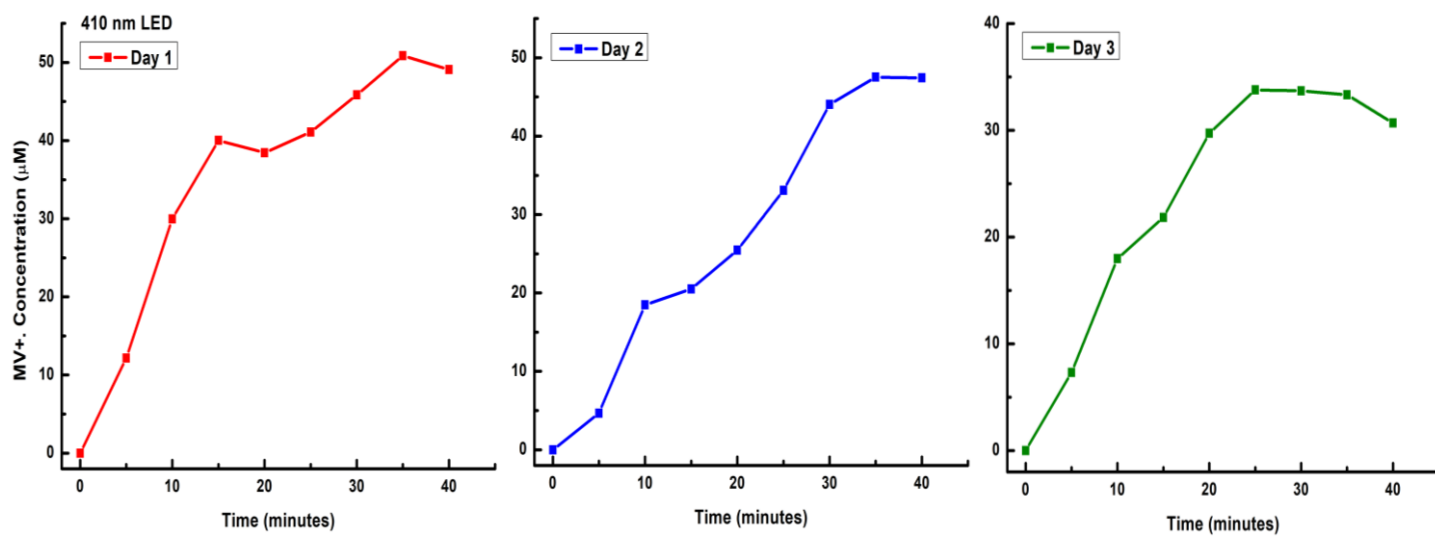

**Figure S11:** Sequential MV<sup>2+</sup> photoreduction runs using N-CD-2 using 410 nm LED.

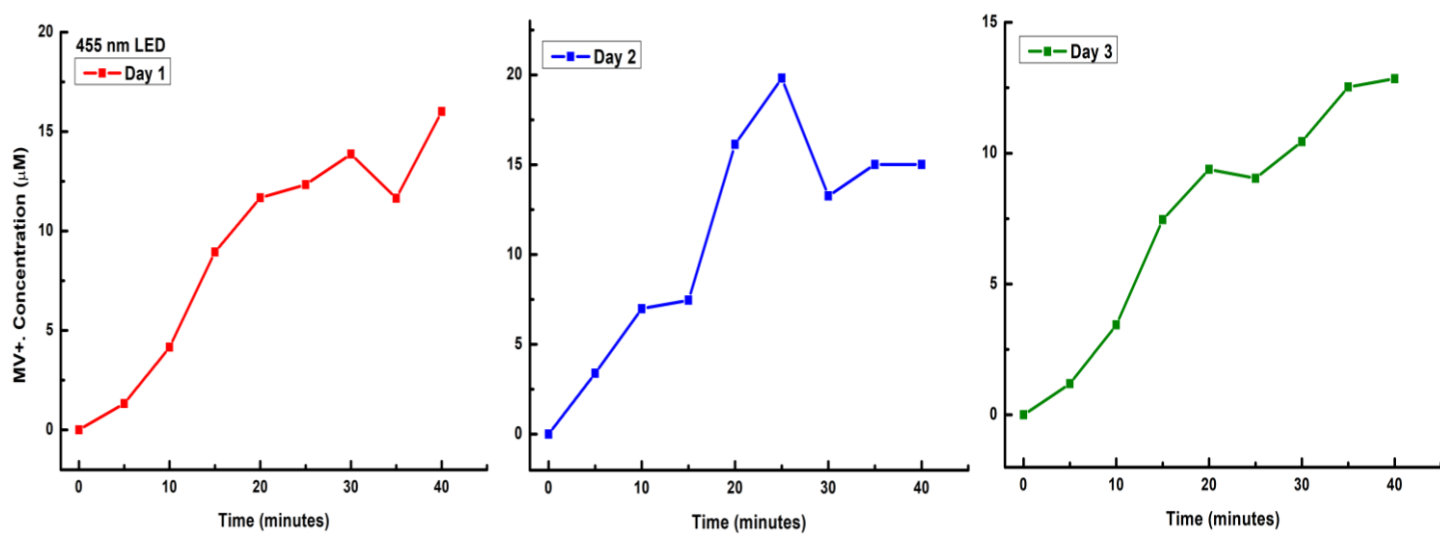

**Figure S12:** Sequential MV<sup>2+</sup> photoreduction runs using N-CD-2 using 455 nm LED.

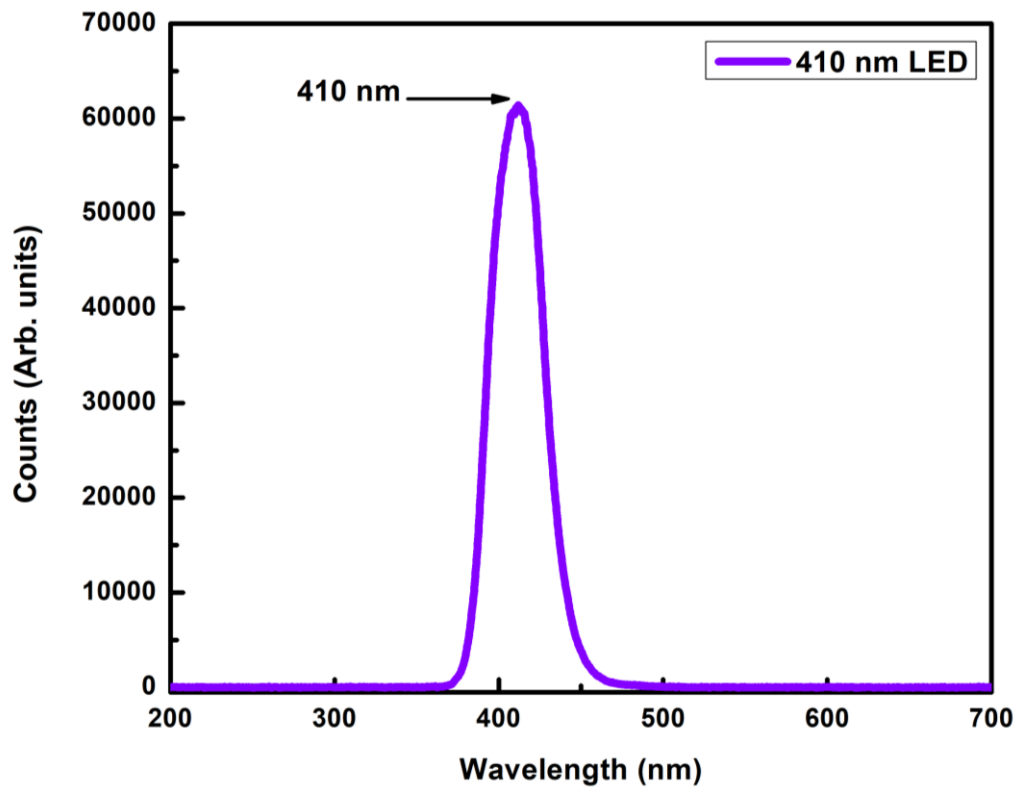

**Figure S13:** Spectra of 410 nm LED employed as light source of illumination, taken via absorption spectrometer, Model No. Avantes Starline, Avaspec-3648.

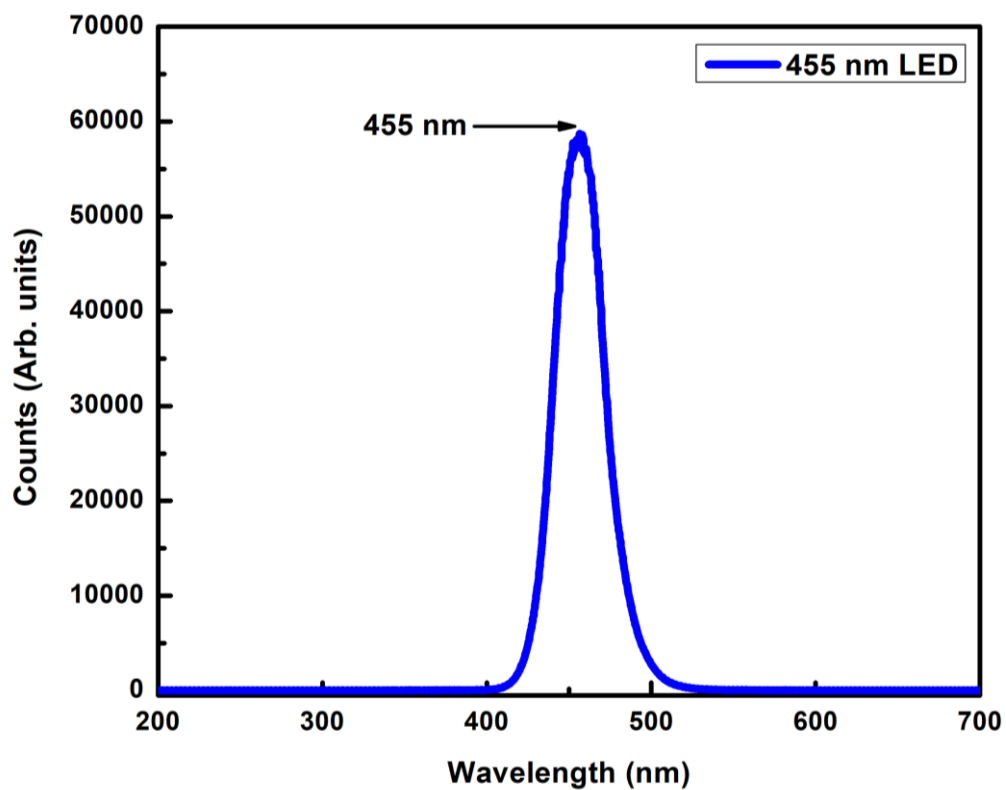

**Figure S14:** Spectra of 455 nm LED employed as light source of illumination, taken absorption spectrometer, Model No. Avantes Starline, Avaspec-3648.
